# Supplementary material
Source: PubMed Central journal article supplement (PMC5890516)

**Supplementary data:**

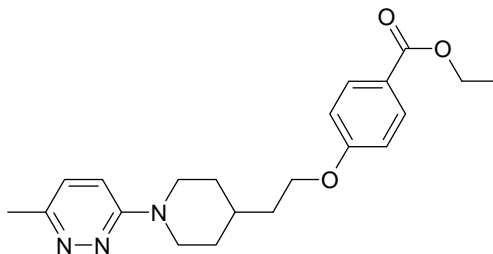

**a) Pirodavir**

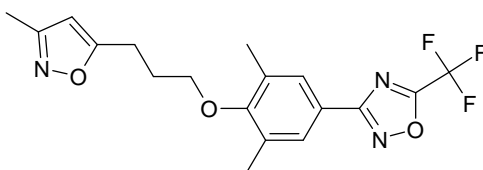

**b) Pleconaril**

**Scheme 1.** Structural formulae of (a) pirodavir and (b) pleconaril.

**Scheme 2.** Structural formulae of the novel anti-enterovirus compounds **6b-10c**

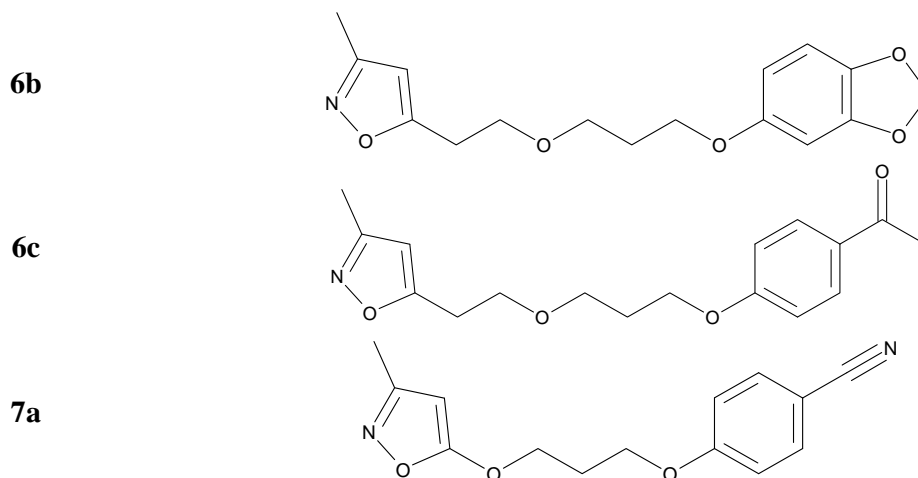

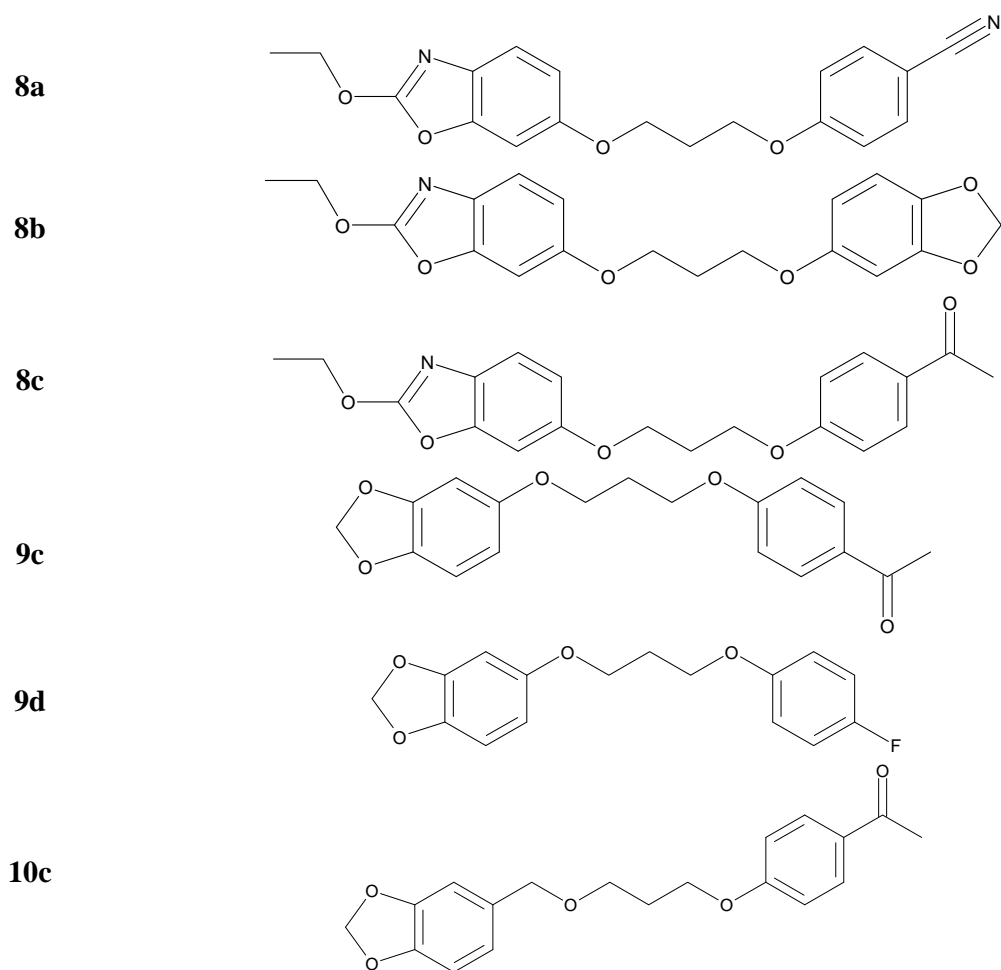

**Scheme 3.** Structural formulae of the novel anti-enterovirus compounds **6002-6702**.

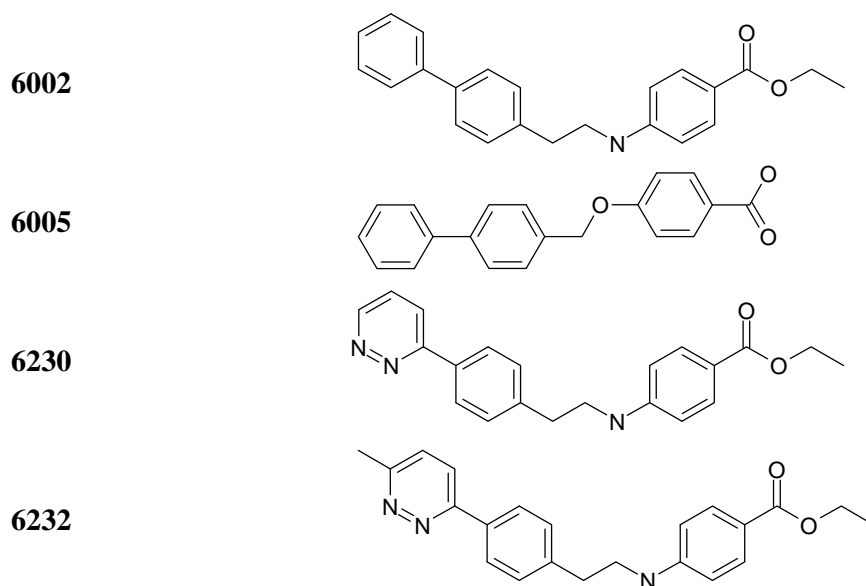

6273

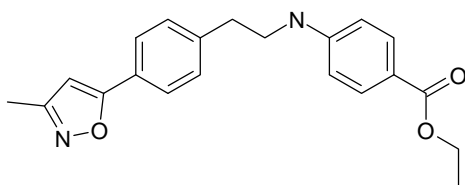

6373

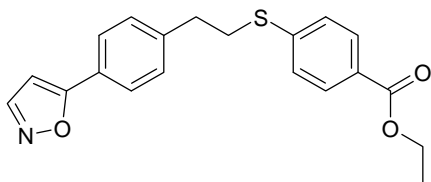

6473

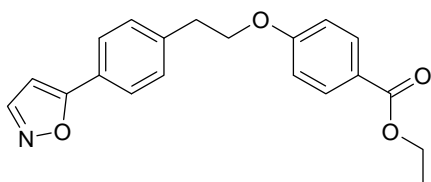

6501

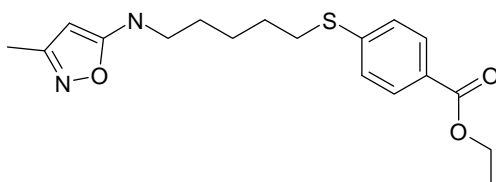

6502

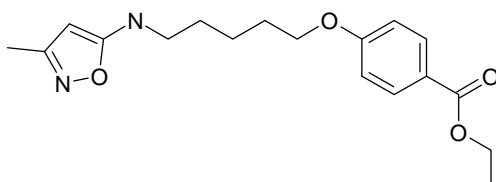

6702

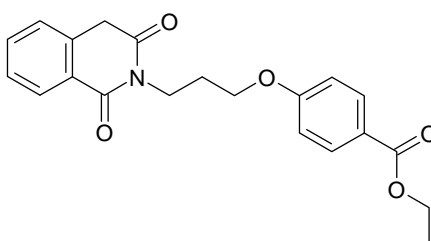

Supplement: AVC589035_supp.pdf [file AVC589035_supp.pdf]
